# Supplementary material for: Occupational Exposure to Pesticides and Lung Cancer Risk: A Propensity Score Analyses
Source: PubMed Central journal article supplement — Cancer Res Treat. 2021 Mar 31;54(1):130–9. doi: 10.4143/crt.2020.1106 (PMC8756132; doi:10.4143/crt.2020.1106), 2021-03-31
Supplement: crt-2020-1106_S1Table.pdf [file crt-2020-1106_S1Table.pdf]

**S1 Table.** Hazard ratios for lung cancer incidence according to history of pesticide exposure, and smoking status after excluding subjects with a follow-up period of equal or less than 3 years

|                                             | Overall (n=7,289) |                       |         | Men (n=2,627) |                        |         | Women (n=4,662) |                      |         |
|---------------------------------------------|-------------------|-----------------------|---------|---------------|------------------------|---------|-----------------|----------------------|---------|
|                                             | Cases (%)         | HR (95% C.I.)         | p-value | Cases (%)     | HR (95% C.I.)          | p-value | Cases (%)       | HR (95% C.I.)        | p-value |
| <b>Model 1</b>                              |                   |                       |         |               |                        |         |                 |                      |         |
| Occupational pesticide use                  |                   |                       |         |               |                        |         |                 |                      |         |
| No                                          | 24 (0.7)          | 1.000 (reference)     |         | 11 (1.2)      | 1.000 (reference)      |         | 13 (0.5)        | 1.000 (reference)    |         |
| Yes                                         | 66 (1.7)          | 3.068 (1.891-4.977)   | < 0.001 | 53 (3.2)      | 3.353 (1.705, 6.596)   | 0.001   | 13 (0.6)        | 1.443 (0.656, 3.174) | 0.362   |
| Average frequency of pesticide use per year |                   |                       |         |               |                        |         |                 |                      |         |
| Continuous                                  |                   | 1.015 (1.002-1.029)   | 0.028   |               | 1.009 (0.991-1.026)    | 0.328   |                 | 1.008 (0.973-1.044)  | 0.649   |
| < 5                                         | 46 (1.1)          | 1.000 (reference)     |         | 29 (2.2)      | 1.000 (reference)      |         | 17 (0.6)        | 1.000 (reference)    |         |
| 5-9                                         | 9 (0.9)           | 0.902 (0.440-1.847)   | 0.778   | 7 (1.9)       | 0.889 (0.388-2.034)    | 0.780   | 2 (0.3)         | 0.617 (0.142-2.683)  | 0.519   |
| 10-19                                       | 26 (2.0)          | 1.945 (1.198-3.159)   | 0.007   | 21 (3.6)      | 1.638 (0.93-2.885)     | 0.087   | 5 (0.7)         | 1.292 (0.473-3.527)  | 0.617   |
| ≥ 20                                        | 9 (1.5)           | 1.491 (0.728-3.055)   | 0.275   | 7 (2.1)       | 0.972 (0.424-2.225)    | 0.946   | 2 (0.7)         | 1.402 (0.322-6.100)  | 0.652   |
| Duration of pesticide use (yr)              |                   |                       |         |               |                        |         |                 |                      |         |
| Continuous                                  |                   | 1.025 (1.014-1.037)   | < 0.001 |               | 1.02 (1.006-1.035)     | 0.006   |                 | 1.021 (1.000-1.042)  | 0.054   |
| < 5                                         | 20 (0.7)          | 1.000 (reference)     |         | 9 (1.2)       | 1.000 (reference)      |         | 11 (0.5)        | 1.000 (reference)    |         |
| 5-9                                         | 4 (1.2)           | 2.202 (0.745-6.508)   | 0.154   | 3 (2.2)       | 2.25 (0.598-8.47)      | 0.231   | 1 (0.5)         | 1.271 (0.163-9.945)  | 0.820   |
| 10-19                                       | 8 (1.2)           | 2.028 (0.881-4.666)   | 0.096   | 7 (2.5)       | 2.642 (0.960-7.273)    | 0.060   | 1 (0.2)         | 0.558 (0.071-4.363)  | 0.578   |
| ≥ 20                                        | 58 (1.7)          | 3.171 (1.867-5.386)   | < 0.001 | 45 (3.1)      | 3.236 (1.530-6.842)    | 0.002   | 13 (0.7)        | 1.701 (0.742-3.897)  | 0.209   |
| Smoking status, pack-years                  |                   |                       |         |               |                        |         |                 |                      |         |
| Continuous                                  |                   | 1.03 (1.025-1.035)    | < 0.001 |               | 1.024 (1.017-1.031)    | < 0.001 |                 | 1.035 (0.995-1.077)  | 0.086   |
| Never smoker                                | 21 (0.4)          | 1.000 (reference)     |         | 1 (0.2)       | 1.000 (reference)      |         | 20 (0.5)        | 1.000 (reference)    |         |
| < 30                                        | 23 (1.7)          | 4.193 (2.320-7.577)   | < 0.001 | 18 (1.7)      | 8.872 (1.184-66.474)   | 0.034   | 5 (1.7)         | 4.166 (1.562-11.115) | 0.004   |
| ≥ 30                                        | 46 (4.3)          | 11.487 (6.842-19.285) | < 0.001 | 45 (4.4)      | 25.064 (3.455-181.824) | 0.001   | 1 (2.4)         | 5.869 (0.788-43.730) | 0.084   |
| <b>Model 2</b>                              |                   |                       |         |               |                        |         |                 |                      |         |
| Occupational pesticide use                  |                   |                       |         |               |                        |         |                 |                      |         |
| No,                                         | 24 (0.7)          | 1.000 (reference)     |         | 11 (1.2)      | 1.000 (reference)      |         | 13 (0.5)        | 1.000 (reference)    |         |
| Yes                                         | 66 (1.7)          | 1.825 (1.026-3.248)   | 0.041   | 53 (3.2)      | 2.469 (1.071-5.691)    | 0.034   | 13 (0.6)        | 1.245 (0.492-3.147)  | 0.643   |
| Average frequency of pesticide              |                   |                       |         |               |                        |         |                 |                      |         |

|                                |          |                      |         |          |                        |         |          |                      |       |
|--------------------------------|----------|----------------------|---------|----------|------------------------|---------|----------|----------------------|-------|
| use per year                   |          |                      |         |          |                        |         |          |                      |       |
| Continuous                     |          | 1 (0.981-1.018)      | 0.959   |          | 0.997 (0.976-1.019)    | 0.809   |          | 1.009 (0.969-1.051)  | 0.666 |
| < 5                            | 46 (1.1) | 1.000 (reference)    |         | 29 (2.2) | 1.000 (reference)      |         | 17 (0.6) | 1.000 (reference)    |       |
| 5-9                            | 9 (0.9)  | 0.643 (0.306-1.353)  | 0.245   | 7 (1.9)  | 0.697 (0.294-1.654)    | 0.413   | 2 (0.3)  | 0.595 (0.130-2.727)  | 0.504 |
| 10-19                          | 26 (2.0) | 1.169 (0.676-2.020)  | 0.577   | 21 (3.6) | 1.16 (0.607-2.217)     | 0.654   | 5 (0.7)  | 1.17 (0.393-3.485)   | 0.778 |
| ≥ 20                           | 9 (1.5)  | 0.729 (0.333-1.595)  | 0.429   | 7 (2.1)  | 0.609 (0.244-1.521)    | 0.288   | 2 (0.7)  | 1.234 (0.262-5.810)  | 0.791 |
| Duration of pesticide use (yr) |          |                      |         |          |                        |         |          |                      |       |
| Continuous                     |          | 1.002 (0.989-1.015)  | 0.768   |          | 0.996 (0.980-1.012)    | 0.626   |          | 1.015 (0.993-1.039)  | 0.189 |
| < 5                            | 20 (0.7) | 1.000 (reference)    |         | 9 (1.2)  | 1.000 (reference)      |         | 11 (0.5) | 1.000 (reference)    |       |
| 5-9                            | 4 (1.2)  | 1.744 (0.571-5.331)  | 0.329   | 3 (2.2)  | 2.773 (0.671-11.460)   | 0.159   | 1 (0.5)  | 1.207 (0.149-9.770)  | 0.860 |
| 10-19                          | 8 (1.2)  | 1.519 (0.625-3.693)  | 0.356   | 7 (2.5)  | 2.645 (0.835-8.376)    | 0.098   | 1 (0.2)  | 0.538 (0.066-4.360)  | 0.561 |
| ≥ 20                           | 58 (1.7) | 1.564 (0.831-2.946)  | 0.166   | 45 (3.1) | 1.998 (0.776-5.14)     | 0.151   | 13 (0.7) | 1.459 (0.570-3.733)  | 0.430 |
| Smoking status (pack-years)    |          |                      |         |          |                        |         |          |                      |       |
| Continuous                     |          | 1.02 (1.013-1.028)   | < 0.001 |          | 1.021 (1.013-1.029)    | < 0.001 |          | 1.027 (0.984-1.071)  | 0.228 |
| Never smoker                   | 21 (0.4) | 1.000 (reference)    |         | 1 (0.2)  | 1.000 (reference)      |         | 20 (0.5) | 1.000 (reference)    |       |
| < 30                           | 23 (1.7) | 3.433 (1.654-7.126)  | 0.001   | 18 (1.7) | 10.535 (1.400-79.299)  | 0.022   | 5 (1.7)  | 3.448 (1.213-9.805)  | 0.020 |
| ≥ 30                           | 46 (4.3) | 7.485 (3.488-16.060) | < 0.001 | 45 (4.4) | 22.023 (3.023-160.467) | 0.002   | 1 (2.4)  | 4.721 (0.583-38.218) | 0.146 |

CI, confidence interval; HR, hazard ratio. Model 1: unadjusted. Model 2: Adjusted by age (continuous), sex, smoking status (pack-years, continuous), alcohol consumption, physical activity, obesity, education level, year of cohort entry and study area.
